# Supplementary material for: Paper-Based Interleukin-6 Test Strip for Early Detection of Wound Infection
Source: MDPI journal article supplement (doi:10.3390/biomedicines10071585), 2022-07-03
Supplement: s1 [file s1]

**Supplementary Table S1.** Patient information, tissue IL-6 concentrations (conventional ELISA and IL-6 test strip), systemic CRP levels and microorganisms and pathological findings

| Sample ID | Patient No. | Age (y/0) | Sex | Sample type | CRP (mg/L) | Plate ELISA (IL-6, pg/mL) | Paper-based ELISA (IL-6, pg/mL) | Infection | microorganism or pathology                                                         |
|-----------|-------------|-----------|-----|-------------|------------|---------------------------|---------------------------------|-----------|------------------------------------------------------------------------------------|
| 1         | 1           | 67        | M   | Acute       | 364.4      | 12.02                     |                                 | Yes       | Escherichia coli, Enterococcus faecalis                                            |
| 2         | 1           | 67        | M   | Acute       | 25.9       | 96.95                     |                                 | Yes       | Acinetobacter pittii, Escherichia coli                                             |
| 3         | 1           | 67        | M   | Acute       | 129.8      | 242.72                    | 200.48                          | Yes       | Klebsiella pneumoniae                                                              |
| 4         | 2           | 57        | M   | Acute       | 230        | 27.78                     |                                 | Yes       | Morganella morganii, Klebsiella pneumoniae, Proteus vulgaris, Vagococcus fluvialis |
| 5         | 2           | 57        | M   | Acute       | 12.2       | 20.29                     |                                 | No        | -                                                                                  |
| 6         | 3           | 33        | M   | Acute       | 24.3       | 16.71                     |                                 | No        | -                                                                                  |
| 7         | 4           | 73        | M   | Acute       | 1.6        | 34.5                      |                                 | No        | -                                                                                  |
| 8         | 4           | 73        | M   | Acute       | 1.4        | 7.56                      |                                 | No        | -                                                                                  |
| 9         | 4           | 73        | M   | Acute       | 2.6        | 2.59                      |                                 | No        | -                                                                                  |
| 10        | 4           | 73        | M   | Acute       | 7.1        | 8.66                      |                                 | No        | -                                                                                  |
| 11        | 5           | 62        | M   | Acute       | 7.7        | 308.88                    |                                 | Yes       | Streptococcus mitis, Streptococcus oralis, Enterococcus faecalis                   |
| 12        | 6           | 59        | M   | Acute       | 27.4       | 19.1                      |                                 | Yes       | Streptococcus agalactiae, Klebsiella pneumoniae, Citrobacter koseri                |
| 13        | 7           | 51        | M   | Acute       | 9.9        | 178.9                     |                                 | Yes       | Escherichia coli, Serratia marcescens, Enterococcus faecalis                       |
| 14        | 8           | 65        | M   | Acute       | 61.1       | 8.86                      |                                 | No        | Yeast                                                                              |
| 15        | 9           | 75        | F   | Acute       | 29         | 47.54                     |                                 | Yes       | -                                                                                  |
| 16        | 9           | 75        | F   | Acute       | 12.9       | 13.33                     |                                 | No        | Citrobacter braakii, Enterococcus faecalis                                         |
| 17        | 9           | 75        | F   | Acute       | 7.9        | 26.46                     |                                 | No        | -                                                                                  |

|    |    |    |   |         |       |         |         |     |                                                                   |
|----|----|----|---|---------|-------|---------|---------|-----|-------------------------------------------------------------------|
| 18 | 10 | 57 | M | Acute   | 4.5   | 107.62  | 363.65  | Yes | Tissue necrosis with infection                                    |
| 19 | 11 | 67 | F | Acute   | 4     | 56.9    | 110.48  | Yes | Proteus mirabilis, Enterococcus faecalis                          |
| 20 | 11 | 67 | F | Acute   | 1.3   | 50.79   |         | Yes | Proteus mirabilis, Enterococcus faecalis                          |
| 21 | 11 | 67 | F | Acute   | 2.5   | 49.24   |         | Yes | Proteus mirabilis, Enterococcus faecalis                          |
| 22 | 12 | 73 | F | Acute   | 9.8   | 690.22  | 265.42  | Yes | tissue necrosis Klebsiella pneumoniae, Enterococcus faecium,      |
| 23 | 13 | 67 | M | Acute   | 110.6 | 1892.65 | 794.69  | Yes | Pseudomonas aeruginosa, Yeast                                     |
| 24 | 14 | 51 | M | Acute   | 111.3 | 1558.5  | 569.49  | Yes | Acute and chronic infection Klebsiella pneumoniae,                |
| 25 | 15 | 62 | M | Acute   | 55.4  | 1996.35 | 427.15  | Yes | Lactococcus lactis, Lactobacillus fermentum                       |
| 26 | 16 | 40 | F | Acute   | 44.7  | 53.75   |         | Yes | Pseudomonas aeruginosa, Serratia marcescens, Paenibacillus cookii |
| 27 | 17 | 39 | M | Acute   | 32    | 35.06   | 30.90   | Yes | Enterococcus faecalis, Corynebacterium striatum                   |
| 28 | 18 | 58 | F | Acute   | 53.8  | 5664.27 | 2951.92 | Yes | Micrococcus luteus                                                |
| 29 | 19 | 41 | M | Acute   | 6.9   | 963.19  | 262.40  | Yes | Pseudomonas stutzeri                                              |
| 30 | 20 | 89 | F | Acute   | 102.8 | 1980.99 | 2084.64 | Yes | Acinetobacter baumannii(XDRAB)                                    |
| 31 | 21 | 64 | M | Acute   | 94.8  | 19.83   | 1.08    | Yes | Proteus mirabilis, Enterococcus faecalis,                         |
| 32 | 22 | 52 | M | Chronic | 9     | 16      |         | Yes | Pseudomonas aeruginosa                                            |
| 33 | 22 | 52 | M | Chronic | 10.8  | 1.1     |         | No  | -                                                                 |
| 34 | 23 | 56 | M | Chronic | 34.8  | 28.62   |         | No  | -                                                                 |

|    |    |    |   |         |       |        |     |                                                                   |
|----|----|----|---|---------|-------|--------|-----|-------------------------------------------------------------------|
| 35 | 23 | 56 | M | Chronic | 2.7   | 17.81  | No  | -                                                                 |
| 36 | 24 | 68 | F | Chronic | 110.8 | 388.2  | Yes | Escherichia coli,<br>Streptococcus<br>dysgalactiae                |
| 37 | 24 | 68 | F | Chronic | 44.0  | 17.43  | No  | -                                                                 |
| 38 | 24 | 68 | F | Chronic | 3.5   | 26.95  | No  | -                                                                 |
| 39 | 25 | 68 | M | Chronic | 164   | 15.02  | Yes | Actinomyces species,<br>Campylobacter<br>ureolyticus              |
| 40 | 25 | 68 | M | Chronic | 172.3 | 36.44  | Yes | Gangrene with<br>infection                                        |
| 41 | 25 | 68 | M | Chronic | 96    | 12.26  | Yes | Escherichia coli,<br>Klebsiella oxytoca,<br>Enterococcus faecalis |
| 42 | 25 | 68 | M | Chronic | 79.3  | 3.29   | No  | -                                                                 |
| 43 | 25 | 68 | M | Chronic | 93    | 13.63  | No  | -                                                                 |
| 44 | 25 | 68 | M | Chronic | 86.4  | 6.07   | No  | -                                                                 |
| 45 | 25 | 68 | M | Chronic | 41.9  | 32.6   | Yes | Escherichia coli                                                  |
| 46 | 25 | 68 | M | Chronic | 4.4   | 3.68   | No  | -                                                                 |
| 47 | 26 | 72 | M | Chronic | 2.8   | 10.33  | No  | -                                                                 |
| 48 | 27 | 57 | M | Chronic | 16.8  | 12.86  | No  | -                                                                 |
| 49 | 28 | 61 | F | Chronic | 112   | 8.26   | Yes | Staphylococcus<br>aureus(ORSA),<br>Pseudomonas<br>aeruginosa      |
| 50 | 28 | 61 | F | Chronic | 43.9  | 25.76  | Yes | ORSA                                                              |
| 51 | 29 | 60 | F | Chronic | 2.0   | 63.4   | Yes | Tissue necrosis with<br>infection                                 |
| 52 | 30 | 37 | M | Chronic | 61    | 19     | No  | -                                                                 |
| 53 | 30 | 37 | M | Chronic | 17.4  | 19.6   | No  | -                                                                 |
| 54 | 30 | 37 | M | Chronic | 19.5  | 24.87  | No  | -                                                                 |
| 55 | 31 | 71 | M | Chronic | 2.8   | 86.52  | Yes | Acute suppurative<br>infection                                    |
| 56 | 31 | 71 | M | Chronic | 50.3  | 16.31  | No  | -                                                                 |
| 57 | 32 | 89 | M | Chronic | 101   | 12.5   | No  | -                                                                 |
| 58 | 33 | 85 | F | Chronic | 67.4  | 74.7   | Yes | Escherichia coli,<br>Klebsiella<br>pneumoniae                     |
| 59 | 34 | 64 | M | Chronic | 281   | 25.91  | No  | -                                                                 |
| 60 | 34 | 64 | M | Chronic | 13.9  | 224.76 | Yes | Suppurative<br>inflammation                                       |

|    |    |    |   |         |       |        |        |     |                                |
|----|----|----|---|---------|-------|--------|--------|-----|--------------------------------|
| 61 | 34 | 64 | M | Chronic | 9.4   | 38.73  | 18.28  | Yes | Pseudomonas aeruginosa         |
| 62 | 35 | 82 | F | Chronic | 11.7  | 36.63  |        | Yes | Tissue necrosis with infection |
| 63 | 35 | 82 | F | Chronic | 13.8  | 679.48 | 166.29 | Yes | Tissue necrosis with infection |
| 64 | 36 | 24 | M | Normal  | 0.5   | 8.53   |        | No  | -                              |
| 65 | 37 | 25 | F | Normal  | 22.5  | 14.9   |        | No  | -                              |
| 66 | 37 | 25 | F | Normal  | 0.8   | 21.09  |        | No  | -                              |
| 67 | 38 | 55 | F | Normal  | 4.2   | 9.37   |        | No  | -                              |
| 68 | 39 | 71 | M | Normal  | 371.5 | 21     |        | No  | -                              |
| 69 | 40 | 61 | M | Normal  |       | 20.6   |        | No  | -                              |
| 70 | 41 | 51 | M | Normal  | 0.8   | 20.2   |        | No  | -                              |
| 71 | 42 | 67 | M | Normal  |       | 54.8   |        | No  | -                              |
| 72 | 43 | 47 | F | Normal  | 190.8 | 31.9   |        | No  | -                              |
| 73 | 44 | 61 | M | Normal  | 0.9   | 0.9    |        | No  | -                              |
| 74 | 45 | 70 | F | Normal  |       | 3.29   |        | No  | -                              |
| 75 | 46 | 50 | F | Normal  |       | 42.77  |        | No  | -                              |
| 76 | 47 | 55 | M | Normal  |       | 19.5   |        | No  | -                              |
| 77 | 48 | 49 | M | Normal  |       | 18.6   |        | No  | -                              |
| 78 | 49 | 55 | M | Normal  |       | 0.8    |        | No  | -                              |
| 79 | 50 | 62 | M | Normal  |       | 3.49   |        | No  | -                              |
| 80 | 51 | 32 | F | Normal  |       | 32.23  |        | No  | -                              |
| 81 | 52 | 58 | M | Normal  |       | 1.2    |        | No  | -                              |
| 82 | 53 | 38 | F | Normal  |       | 25.5   |        | No  | -                              |
